# Supplementary material for: Phenolic compounds from Nicotiana tabacum inflorescence: optimized extraction, chemical composition, evaluation of antioxidant activity integrating network pharmacology and molecular docking analysis
Source: Research Square preprint supplement (doi:10.21203/rs.3.rs-8626691/v1), 2026-01-30
Supplement: Supplementary file 1 [file 558e41e2391175c7b3b4eac0.docx]

**Supplementary material: Tables S1-S4 and Figure S1**

**Table S1** Single-factor experimental design of phenolic compounds extraction from tobacco inflorescences.

| **Single factor** | **Ethanol concentration (%)** | **Liquid-solid ratio (mL/g)** | **Ultrasound power (W)** | **Extraction time (min)** | **Extraction temperature (°C)** |
| --- | --- | --- | --- | --- | --- |
| Ethanol concentration | 10,20,30,40,50,60,70,80,90,100 | 40 | 40 | 40 | 40 |
| Liquid-solid ratio | 40 | 10,20,30,40,50,60,70,80,90,100 | 40 | 40 | 40 |
| Ultrasound power | 100 | 100 | 50,100,150,200,250,300,350,400,450,500 | 100 | 100 |
| Extraction time | 10 | 10 | 10 | 5,10,15,20,25,30,35,40,45,50 | 10 |
| Extraction temperature | 20 | 20 | 20 | 20 | 20,30,40,50,60,70 |

**Table S2** Factors and their coding levels in experimental design for phenolic compounds extraction from tobacco inflorescences using RSM.

| **Factors** | **Code Unit** | **Coded variable level** | | |
| --- | --- | --- | --- | --- |
|  |  | −1 | 0 | 1 |
| Ethanol concentration (%) | A | 20 | 40 | 60 |
| Liquid-solid ratio (mL/g) | B | 20 | 40 | 60 |
| Extraction time (min) | C | 10 | 25 | 40 |
| Ultrasound power (W) | D | 200 | 300 | 400 |

**Table S3** Box-Behnken experimental design and resultant responses.

| **Run** | **A: Ethanol concentration (%)** | **B: Liquid-solid ratio (mL/g)** | **C: Extraction time (min)** | **D:** **Ultrasound power (W)** | **Y: TPC (mg GAE/g DW) *** |
| --- | --- | --- | --- | --- | --- |
| 1 | −1(20) | 0(40) | 0(25) | −1(200) | 18.18 |
| 2 | 0(40) | −1(20) | 0(25) | −1(200) | 19.30 |
| 3 | 0(40) | 0(40) | −1(10) | −1(200) | 19.97 |
| 4 | 0(40) | 0(40) | 1(40) | −1(200) | 20.08 |
| 5 | 0(40) | 1(60) | 0(25) | −1(200) | 20.80 |
| 6 | 1(60) | 0(40) | 0(25) | −1(200) | 18.95 |
| 7 | −1(20) | −1(20) | 0(25) | 0(300) | 17.56 |
| 8 | −1(20) | 0(40) | −1(10) | 0(300) | 18.08 |
| 9 | −1(20) | 0(40) | 1(40) | 0(300) | 18.67 |
| 10 | −1(20) | 1(60) | 0(25) | 0(300) | 20.38 |
| 11 | 0(40) | −1(20) | −1(10) | 0(300) | 19.74 |
| 12 | 0(40) | −1(20) | 1(40) | 0(300) | 20.56 |
| 13 | 0(40) | 0(40) | 0(25) | 0(300) | 24.81 |
| 14 | 0(40) | 0(40) | 0(25) | 0(300) | 23.62 |
| 15 | 0(40) | 0(40) | 0(25) | 0(300) | 24.53 |
| 16 | 0(40) | 0(40) | 0(25) | 0(300) | 23.66 |
| 17 | 0(40) | 0(40) | 0(25) | 0(300) | 22.92 |
| 18 | 0(40) | 1(60) | −1(10) | 0(300) | 21.59 |
| 19 | 0(40) | 1(60) | 1(40) | 0(300) | 23.43 |
| 20 | 1(60) | −1(20) | 0(25) | 0(300) | 20.56 |
| 21 | 1(60) | 0(40) | −1(10) | 0(300) | 18.11 |
| 22 | 1(60) | 0(40) | 1(40) | 0(300) | 21.34 |
| 23 | 1(60) | 1(60) | 0(25) | 0(300) | 22.33 |
| 24 | −1(20) | 0(40) | 0(25) | 1(400) | 18.15 |
| 25 | 0(40) | −1(20) | 0(25) | 1(400) | 19.48 |
| 26 | 0(40) | 0(40) | −1(10) | 1(400) | 18.04 |
| 27 | 0(40) | 0(40) | 1(40) | 1(400) | 21.83 |
| 28 | 0(40) | 1(60) | 0(25) | 1(400) | 23.17 |
| 29 | 1(60) | 0(40) | 0(25) | 1(400) | 21.73 |

*Mean of triplicate determination.

**Table S4** MRM ion pairs and calibration curves of standard compounds.

| **No.** | **RT (min)** | **Name** | **Formula** | **Precursor ion (m/z)** | **MS/MS fragments (m/z)** | **Collision Energy (V)** | **Calibration Curve** | **R2** | **Linear range (ng/mL)** | **LOQ (ng/mL)** |
| --- | --- | --- | --- | --- | --- | --- | --- | --- | --- | --- |
| 1 | 5.47 | Rutin | C27H30O16 | 609 | 300, 271 | -50, -69 | y = 12x + 179 | 0.9994 | 50-1000 | 50 |
| 2 | 3.59 | Chlorogenic acid | C16H18O9 | 353 | 191, 179, 161 | -25, -25, -33 | y = 6.69×103x + 2.29×104 | 1.0000 | 50-1000 | 6 |
| 3 | 3.80 | Cryptochlorogenic acid | C16H18O9 | 353.1 | 173, 179, 191, 135 | -21, -23, -30, -44 | y = 2.51×103x – 7.66×103 | 1.0000 | 50-1000 | 0.5 |
| 4 | 2.68 | Neochlorogenic acid | C16H18O9 | 353.1 | 191.1, 179.1, 135.1 | -25, -25, -44 | y = 730 x – 1.1×103 | 0.9998 | 50-1000 | 10 |
| 5 | 4.05 | Caffeic acid | C9H8O4 | 179 | 135, 107, 117 | -21, -31, -31 | y = 4.36×103x + 3.8×104 | 0.9998 | 50-1000 | 50 |
| 6 | 5.61 | Scopoletin | C10H8O4 | 191 | 176, 148, 104 | -21, -27, -32 | y = 5.56×103x – 7×103 | 1.0000 | 50-1000 | 3 |
| 7 | 5.62 | Quercetin | C15H10O7 | 301 | 151, 282.9, 107 | -29, -20, -38 | y = 8.67x + 110 | 0.9994 | 50-1000 | 50 |
| 8 | 9.39 | Kaempferol | C15H10O6 | 285 | 117, 93, 143, 239 | -50, -40, -41, -38 | y = 74.2 x + 2.62×103 | 0.9984 | 50-1000 | 50 |
| 9 | 5.71 | Ferulic acid | C10H10O4 | 193 | 178, 134 | -18, -19 | y = 2.06×103x + 1.07×103 | 1.0000 | 50-1000 | 1.5 |


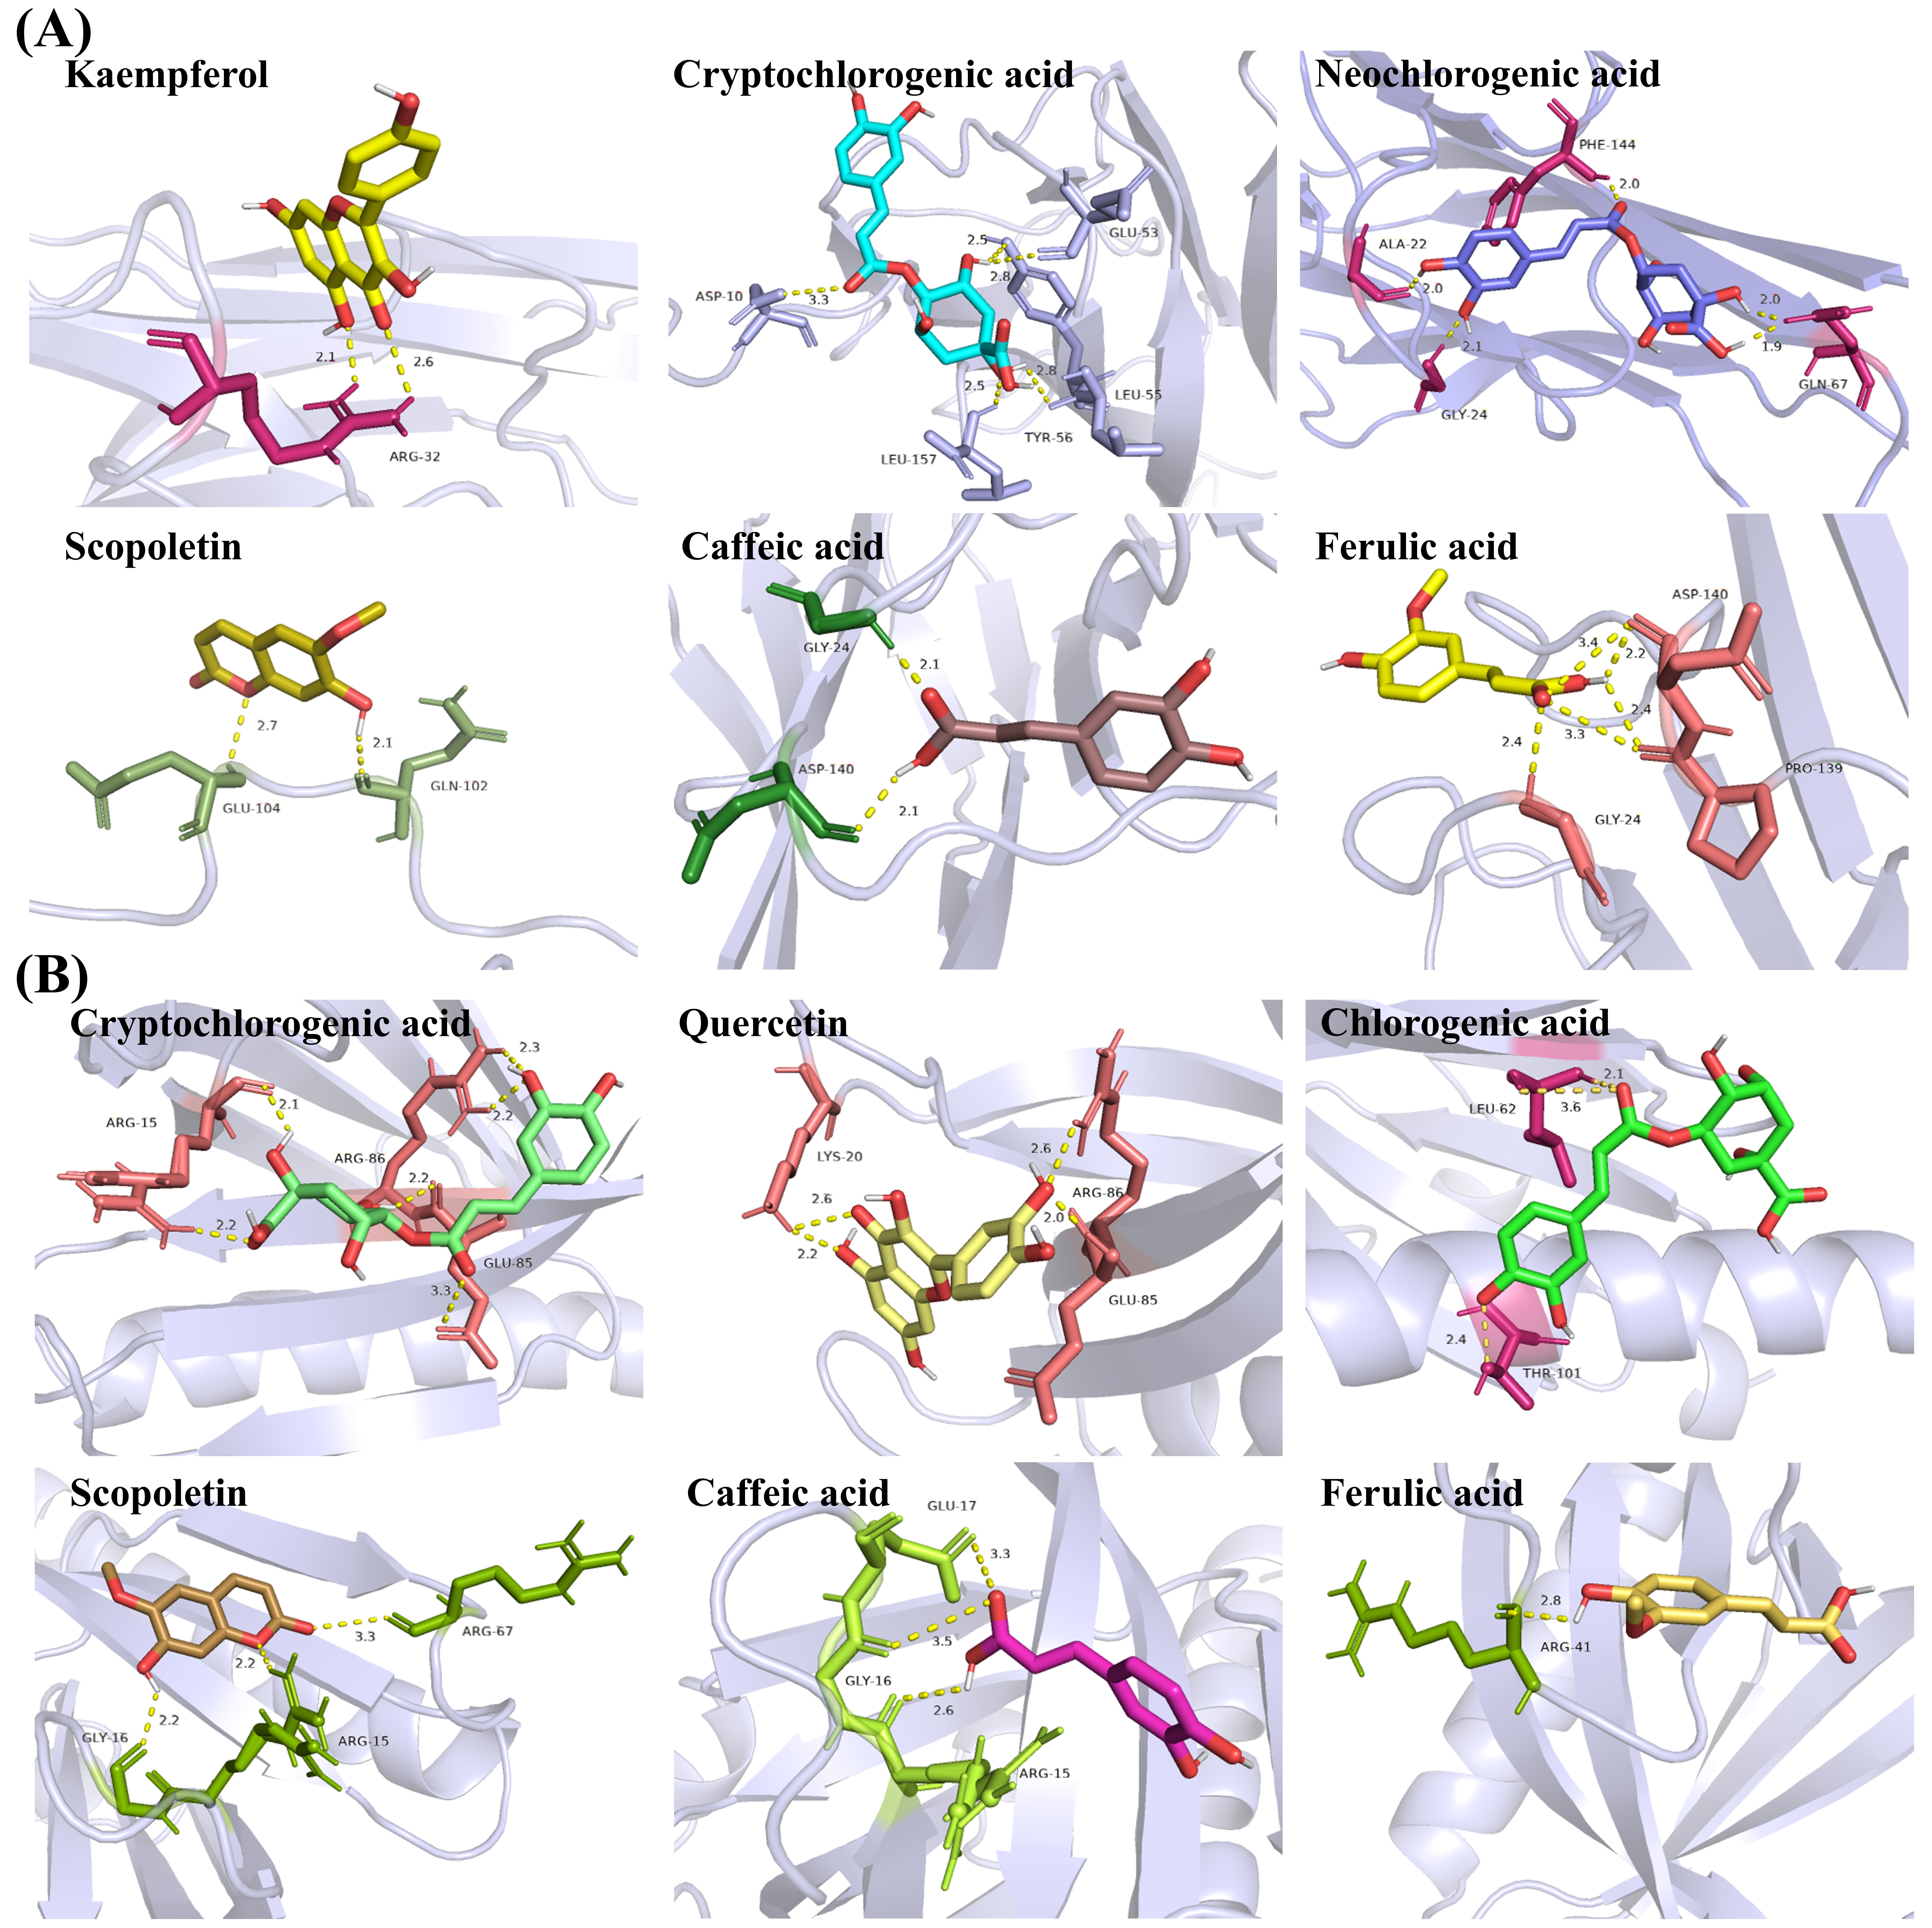


**Fig. S1.** Molecular docking analysis. (A) Molecular docking of kaempferol, cryptochlorogenic acid, neochlorogenic acid, scopoletin, caffeic acid, and ferulic acid with TNF. (B) Molecular docking of cryptochlorogenic acid, quercetin, chlorogenic acid, scopoletin, caffeic acid, and ferulic acid with AKT1.
